# Supplementary material
Source: PubMed Central journal article supplement (PMC6289515)
Supplement: NIHMS1511000-supplement-3.pdf [file NIHMS1511000-supplement-3.pdf]

eFigure 1. Prevalence of vaccine-type and non-vaccine type HPV across time by race (N=2,672)\*

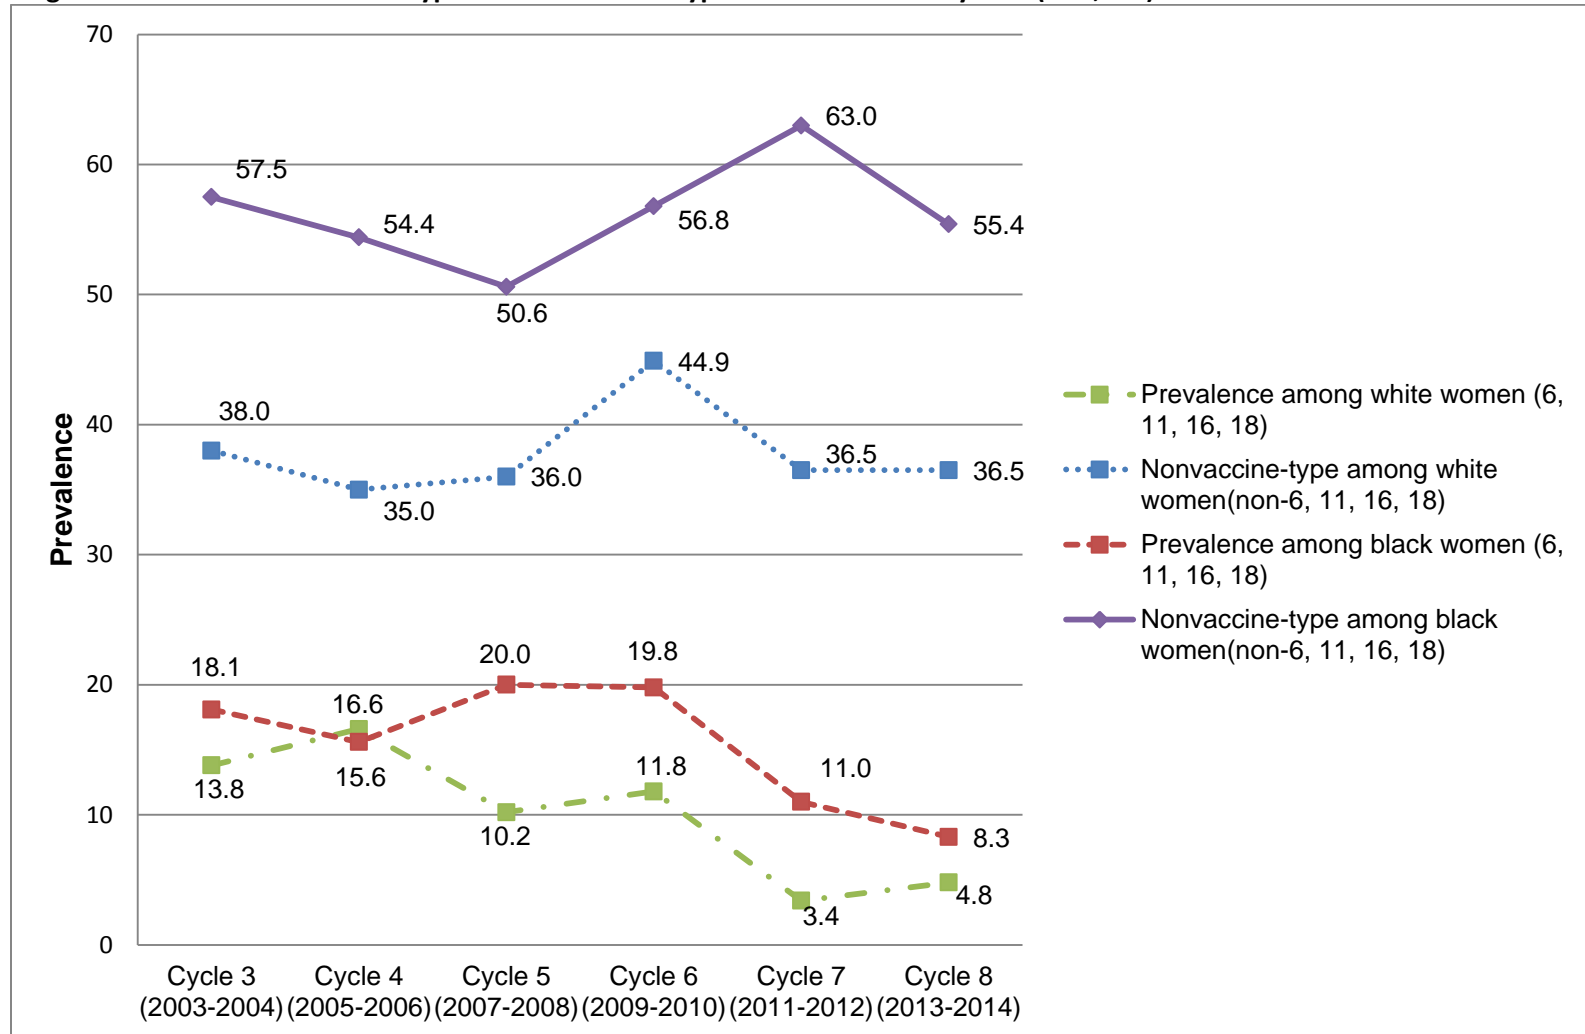

\*Cell sizes for Mexican American and Hispanic women in post-licensure sample were too small to be included.
